# Supplementary material
Source: PubMed Central journal article supplement (PMC7171965)

SUPPLEMENTARY DATA

**Supplementary Figure 1.** Various amounts of skeletal muscle derived from the wild type mice (ranging from 0.05 to 10  $\mu\text{g}$ ) were loaded onto a 15-well SDS-PAGE. After transfer to a PVDF membrane, the membrane was cut in the middle. The left half was probed with mAb-MG53 and the right half probed with Abcam 83302 antibodies. Immunoblots were visualized with an ECL plus kit (Pierce Pico). The images were captured using the BioRad ChemiDoc<sup>TM</sup> Imaging System, under identical exposure conditions (60 s exposure). mAb-MG53 can detect MG53 signal with 0.2  $\mu\text{g}$  muscle loading sample, whereas Abcam 83302 antibody only detects MG53 signal in the 10  $\mu\text{g}$  muscle loading sample.

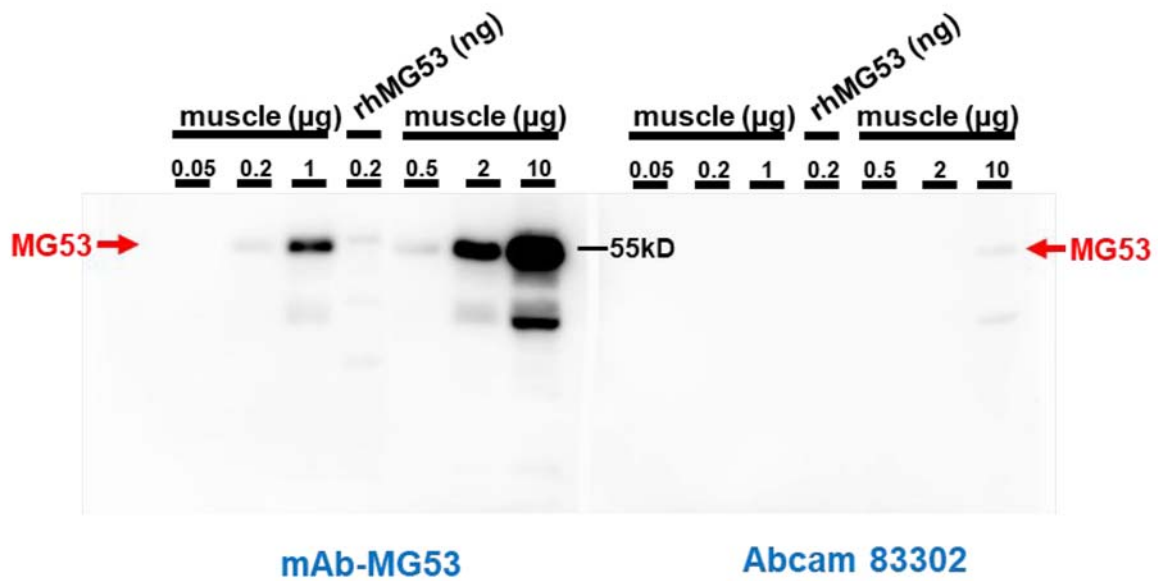

SUPPLEMENTARY DATA

**Supplementary Figure 2.** Mice sera (1  $\mu$ l per lane) derived from three genetic backgrounds were used for WB with mAb-MG53 (*left*) and Abcam 83302 antibody (*right*). Brown – Sv129/C57BL/6; White – Sv129; Black – C57BL/6 (male).

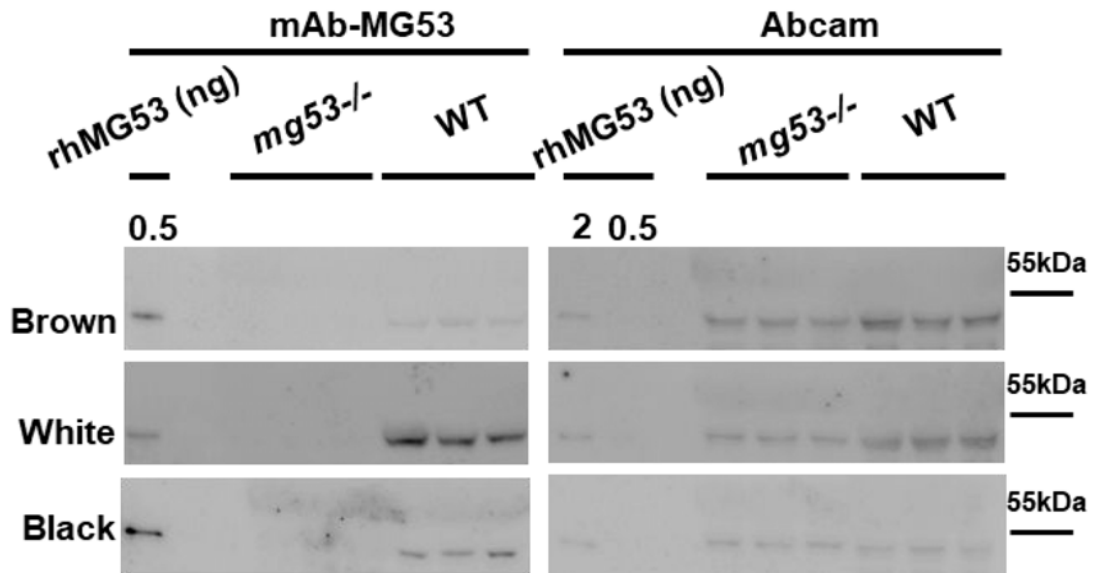

Supplement: DB190807SupplementaryData.pdf [file DB190807SupplementaryData.pdf]
